# Supplementary material
Source: Springer Nature journal article supplement (https://www.springermedizin.de/resource/supplementary/13075_2013_4379_MOESM6_ESM.pdf/9696490)

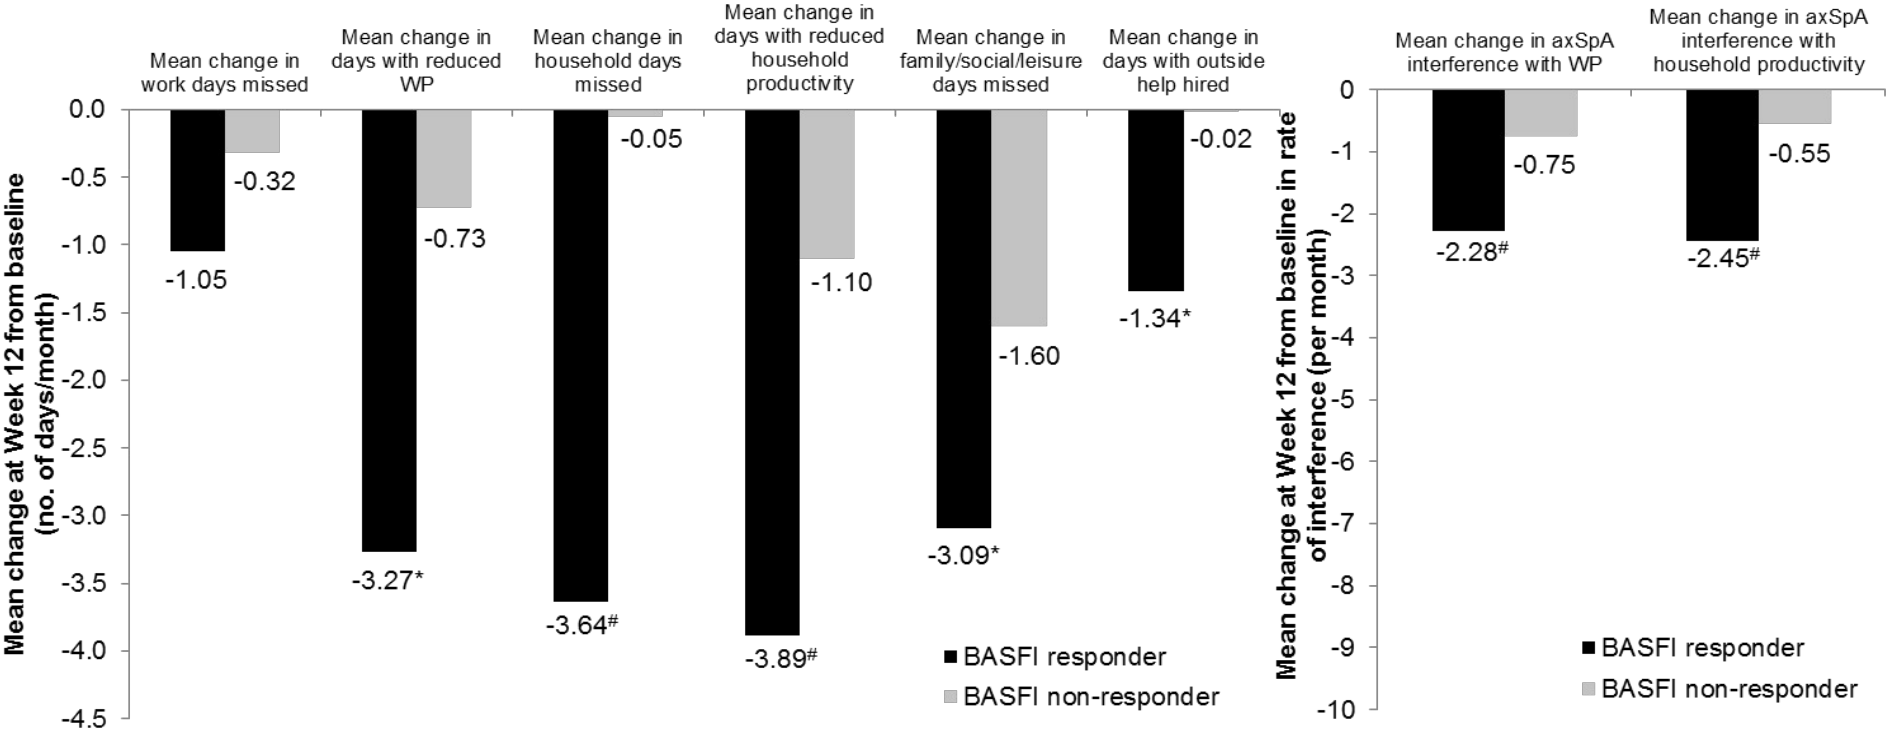

Supplement: MOESM6 [file 9696490]
